# Supplementary material for: Spatial and temporal evolution of future atmospheric reactive nitrogen deposition in China under different climate change mitigation strategies
Source: Copernicus journal article supplement (doi:10.5194/egusphere-2024-1769), 2024-07-22
Supplement: Supplementary file 1 [file egusphere-2024-1769-supplement.pdf]

# Supplement

**Journal:** Atmospheric Chemistry and Physics

**Title:** Spatial and temporal evolution of future atmospheric reactive nitrogen deposition in China under different climate change mitigation strategies

**Authors:** Mingrui Ma, Jiachen Cao, Dan Tong, Bo Zheng, Yu Zhao

## Table List

Table S1 Major physical options for WRF v3.9.1.

Table S2 Spatial correlation (R) between future emission changes and the resulting deposition changes under different future emission scenarios.

Table S3 Simulated outflow fluxes of OXN from WC to EC for Cases where emissions change to 2060s levels in all regions as well as Cases where emissions in WC are maintained at 2010s levels. Relative changes (%) are calculated by comparing Cases with 2060s emission levels in all regions to Cases with 2010s emission levels in WC, then dividing the difference by the 2010s emission levels in WC. The unit for outflow fluxes is  $\text{kg N s}^{-1}$ .

Table S4 Simulated outflow fluxes of OXN from EC for Cases where emissions are maintained at 2010s levels as well as Cases where emissions change to 2060s levels. Relative changes (%) are calculated by comparing Cases with 2060s emission levels to Cases with 2010s emission levels, then dividing the difference by the 2010s emission levels. The unit for outflow fluxes is  $\text{kg N s}^{-1}$ .

27

## 28 **Figure List**

29 **Figure S1** The model domain and defined key regions. The black box represents the  
30 WRF domain, and the green box represents the CMAQ domain. Western and Eastern  
31 China (WC and EC) are divided by 110°E. The red boxes represent the northern China  
32 (NC, 30–45°N, 110–125°E) and southern China (SC, 20–30°N, 110–125°E),  
33 respectively. The blue boxes represent the regions of Beijing-Tianjin-Hebei (BTH),  
34 Yangtze River Delta (YRD, 20–30°N, 110–125°E), and Pearl River Delta (PRD),  
35 respectively.

36 **Figure S2** Spatial distribution of relative changes (%) of NO<sub>x</sub> (a-c) and NH<sub>3</sub>  
37 emissions (d-f) from 2010s (2010-2014) to 2060s (2060-2064) for emission scenarios  
38 of “Baseline”, “Current-goal” and “Neutral-goal”. Relative changes are calculated by  
39 comparing 2060s emission levels to 2010s emission levels, then dividing the  
40 difference by the 2010s emission levels.

41 **Figure S3** Annual average emissions of NO<sub>x</sub>, NH<sub>3</sub>, PM<sub>25</sub>, NMVOC, and SO<sub>2</sub> for  
42 2010s and 2060s for emission scenarios of “Baseline”, “Current-goal”, and  
43 “Neutral-goal”.

44 **Figure S4** Spatial distribution of Nr deposition fluxes in 2060s under “Neutral-goal”  
45 scenario.

46 **Figure S5** Annual average changes in near-surface concentrations of NO<sub>2</sub> (a), O<sub>3</sub> (b),  
47 HNO<sub>3</sub> (c) and DDEP\_OXN (d) attributed to a 20% reduction of emissions in NC for  
48 2010s and 2060s under different emission scenarios.

49

50 **Table S1 Major physical options for WRF v3.9.1.**

| Physical Option                | Setup                                                       |
|--------------------------------|-------------------------------------------------------------|
| Cloud Microphysics             | Lin scheme <sup>a</sup>                                     |
| Long-wave Radiation            | RRTMG scheme <sup>b</sup>                                   |
| Short-wave Radiation           | Goddard scheme <sup>c</sup>                                 |
| Planetary Boundary Layer       | YSU scheme <sup>d</sup>                                     |
| Cumulus                        | G3 scheme <sup>e</sup>                                      |
| Land Surface                   | Noah-MP scheme <sup>f</sup>                                 |
| Urban Canopy                   | UCM scheme <sup>g</sup>                                     |
| Sea Surface Temperature Update | On                                                          |
| Analysis Nudging               | Temperature, water vapor mixing and wind (in and above PBL) |

51 <sup>a</sup>Lin scheme: A sophisticated microphysics scheme to predict different forms of water phase  
 52 substance developed by Lin et al. (1983). The scheme has considered ice, snow and graupel  
 53 processes, suitable for real-data high-resolution simulations.

54 <sup>b</sup>RRTMG scheme: A new version of Rapid Radiative Transfer Model (RRTM) scheme developed  
 55 by Iacono et al. (2008), which included the Monte Carlo Independent Column Approximation  
 56 (MCICA) method of random cloud overlap.

57 <sup>c</sup>Goddard scheme: Two-stream multi-band scheme with ozone from climatology and cloud effects  
 58 developed by Chou and Suarez (1994).

59 <sup>d</sup>YSU scheme: Yonsei University scheme developed by Hong et al. (2006), which explicit  
 60 entrainment layer and parabolic K profile in unstable mixed layer based on the Non-local-K  
 61 scheme.

62 <sup>e</sup>G3 scheme: Grell 3D scheme, which is an improved version of the Grell-Devenyi (GD) ensemble  
 63 scheme (Goodarzi et al. 2019). It could be used on high resolution when considering subsidence  
 64 spreading.

65 <sup>f</sup>Noah-MP scheme: Noah multi-physics Land Surface Model scheme. It contains a separate  
 66 vegetation canopy defined by a canopy top and bottom with leaf physical and radiometric  
 67 properties used in a two-stream canopy radiation transfer scheme that includes shading. Horizontal  
 68 and vertical vegetation density can be prescribed or predicted using prognostic photosynthesis and  
 69 dynamic vegetation models that allocate carbon to vegetation (leaf, stem, wood and root) and soil  
 70 carbon pools (fast and slow) (Niu et al. 2011).

71 <sup>g</sup>UCM scheme: Urban Canopy Models scheme. It considers 3-category surface effects for roofs,  
 72 walls, and streets when calculate the exchange of energy and kinetic energy between the surface  
 73 and the atmosphere (Chen et al. 2011).

74 **Table S2** Spatial correlation (R) between the emission change and the deposition  
75 change from 2010s to 2060s under different emission scenarios.

|     | “Baseline” | “Current-goal” | “Neutral-goal” |
|-----|------------|----------------|----------------|
| OXN | 0.24       | 0.32           | 0.35           |
| RDN | 0.67       | 0.71           | 0.72           |

76  
77

78

79 **Table S3** Simulated outflow fluxes of OXN from WC to EC for Cases where  
80 emissions change to 2060s levels in all regions as well as Cases where emissions in  
81 WC are maintained at 2010s levels. Relative changes (%) are calculated by comparing  
82 Cases with 2060s emission levels in all regions to Cases with 2010s emission levels in  
83 WC, then dividing the difference by the 2010s emission levels in WC. The unit for  
84 outflow fluxes is kg N s<sup>-1</sup>.

|                | Emissions in WC are<br>maintained at 2010s levels | Emissions change to 2060s<br>levels in all regions | Relative<br>change |
|----------------|---------------------------------------------------|----------------------------------------------------|--------------------|
| “Baseline”     | 175.49 (Case 7)                                   | 193.06 (Case 2)                                    | 10%                |
| “Current-goal” | 74.62 (Case 6)                                    | 54.53 (Case 1)                                     | -27%               |
| “Neutral-goal” | 49.31 (Case 8)                                    | 12.19 (Case 5)                                     | -75%               |

85

86

87

88 **Table S4** Simulated outflow fluxes of OXN from EC for Cases where emissions are  
89 maintained at 2010s levels as well as Cases where emissions change to 2060s levels.  
90 Relative changes (%) are calculated by comparing Cases with 2060s emission levels  
91 to Cases with 2010s emission levels, then dividing the difference by the 2010s  
92 emission levels. The unit for outflow fluxes is kg N s<sup>-1</sup>.

|                | Emissions are at<br>2010s levels | Emissions are at<br>2060s levels | Relative<br>change |
|----------------|----------------------------------|----------------------------------|--------------------|
| “Baseline”     | 178.82 (Case4)                   | 213.38 (Case2)                   | 19%                |
| “Current-goal” | 193.70 (Case3)                   | 99.25 (Case1)                    | -49%               |
| “Neutral-goal” | 193.70 (Case3)                   | 20.84 (Case5)                    | -89%               |

93

94

95 **Figure S1**

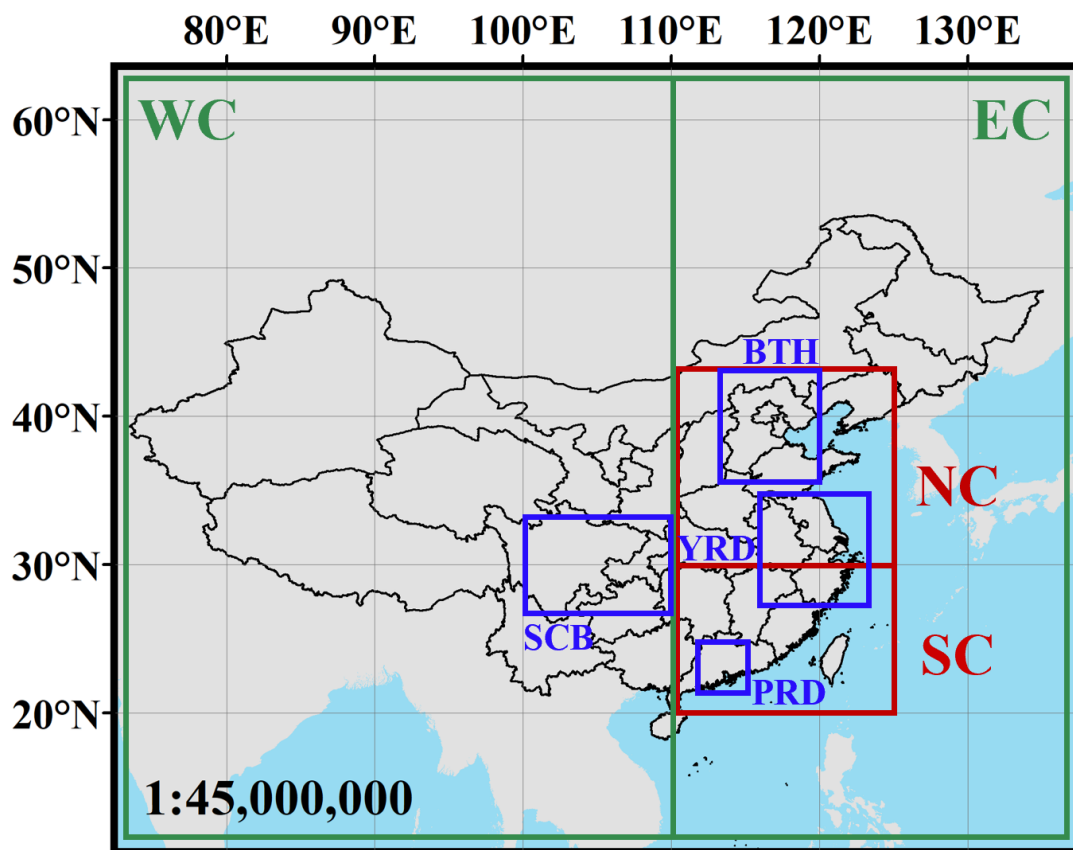

96

97

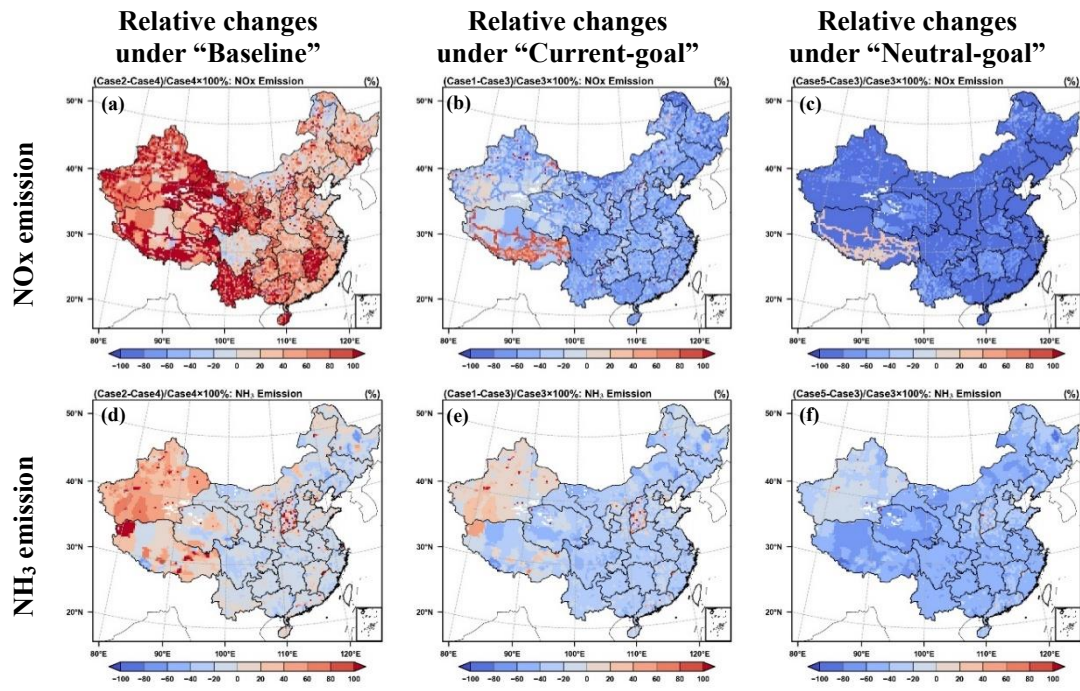

99  
100



101

102 **Figure S3**

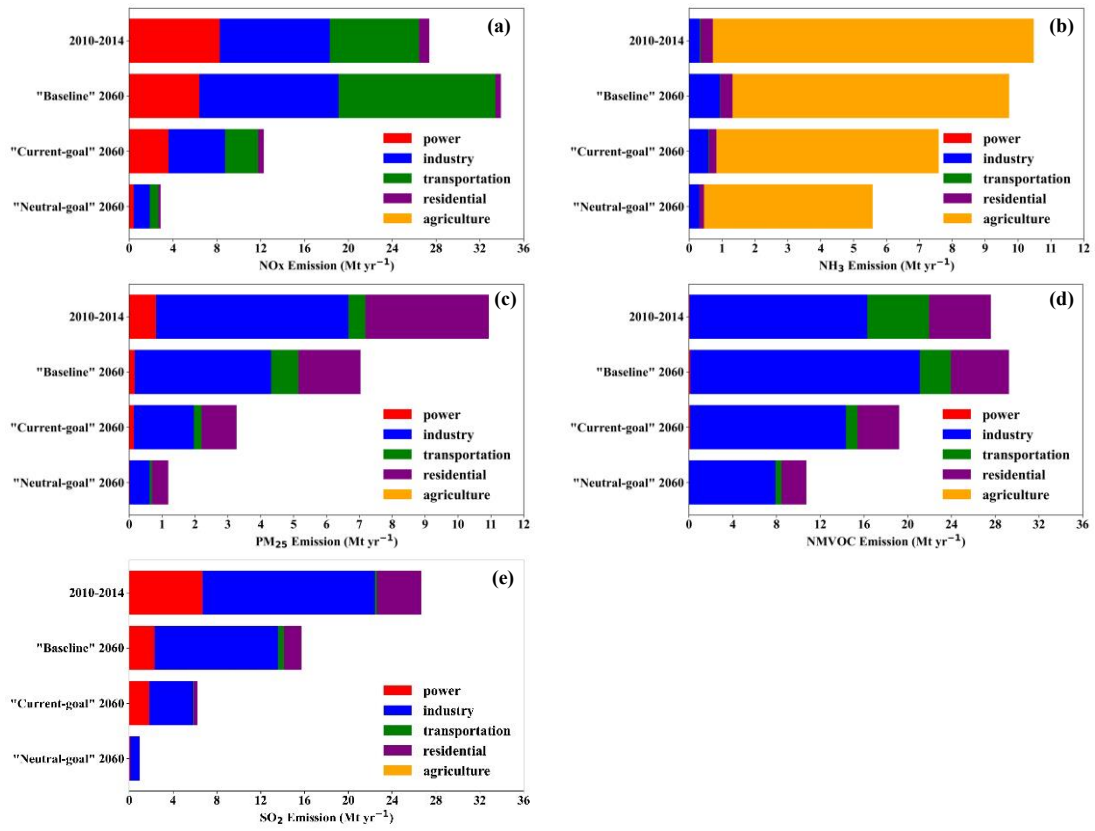

103

104

105

106 **Figure S4**

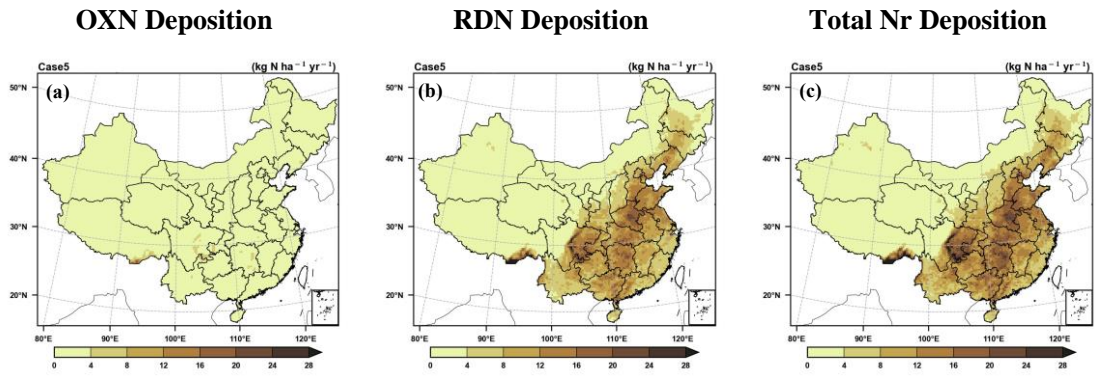

107

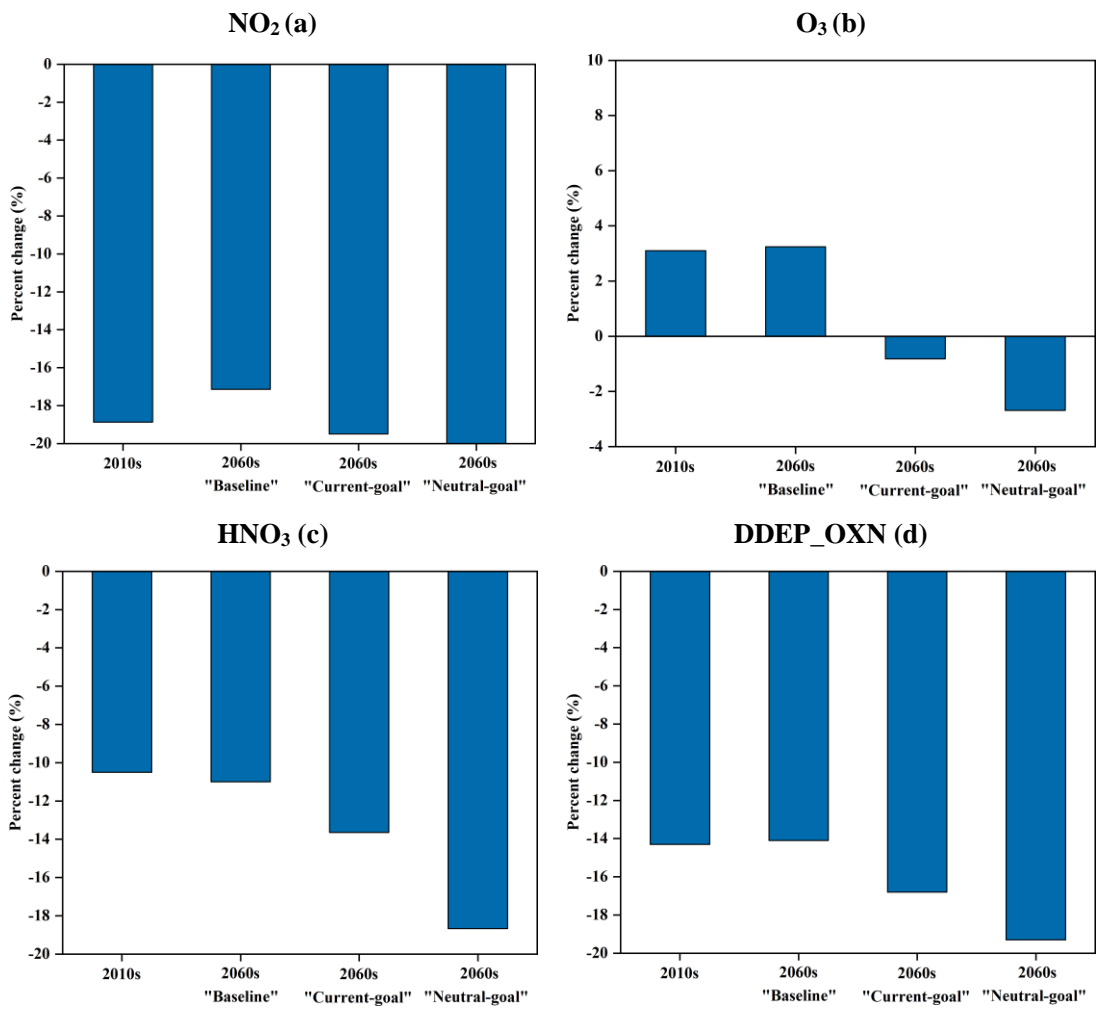

109

110

111

## 112 **Supporting References**

113 Chen, F., Miao, S., Tewari, M., Bao, J., & Kusaka, H. (2011). A numerical study of  
114 interactions between surface forcing and sea breeze circulations and their effects on  
115 stagnation in the greater Houston area. *Journal of Geophysical Research: Atmospheres*,  
116 116, D12105. <https://doi.org/10.1029/2010JD015533>

117 Chou, M. D., & Suarez, M. J. (1994). An efficient thermal infrared radiation  
118 parameterization for use in general circulation models (NASA Tech): Memorandum,  
119 NASA/TM-1994-104606.

120 Goodarzi, L., Banihabib, M. E., & Roozbahani, A. (2019). A decision-making model  
121 for flood warning system based on ensemble forecasts. *Journal of hydrology*, 573,  
122 207-219. <https://doi.org/10.1016/j.jhydrol.2019.03.040>.

123 Hong, S., Noh, Y., & Dudhia, J. (2006). A New Vertical Diffusion Package with an  
124 Explicit Treatment of Entrainment Processes. *Monthly Weather Review*, 134(9),  
125 2318-2341. <https://doi.org/10.1175/MWR3199.1>.

126 Iacono, M. J., Delamere, J. S., Mlawer, E. J., Shephard, M. W., Clough, S. A., &  
127 Collins, W. D. (2008). Radiative forcing by long - lived greenhouse gases:  
128 Calculations with the AER radiative transfer models. *Journal of Geophysical Research:*  
129 *Atmospheres*, 113, D13103. <https://doi.org/10.1029/2008JD009944>.

130 Lin, Y., Farley, R. D., & Orville, H. D. (1983). Bulk parameterization of the snow  
131 field in a cloud model. *Journal of Applied Meteorology and climatology*, 22(6),  
132 1065-1092. [https://doi.org/10.1175/1520-0450\(1983\)022<1065:BPOTSF>2.0.CO;2](https://doi.org/10.1175/1520-0450(1983)022<1065:BPOTSF>2.0.CO;2).

133 Niu, G., Yang, Z., Mitchell, K. E., Chen, F., Ek, M. B., Barlage, M., Kumar, A.,  
134 Manning, K., Niyogi, D., Rosero, Enrique., Tewari, M., & Xia, Y. (2011). The  
135 community Noah land surface model with multiparameterization options (Noah-MP):  
136 1. Model description and evaluation with local-scale measurements. *Journal of*  
137 *Geophysical Research: Atmospheres*, 116, D12109.  
138 <https://doi.org/10.1029/2010JD015139>.

139

140
