# Supplementary material for: Spatial and temporal evolution of future atmospheric reactive nitrogen deposition in China under different climate change mitigation strategies
Source: Copernicus journal article supplement (doi:10.5194/egusphere-2024-1769), 2024-07-22
Supplement: Supplementary file [file egusphere-2024-1769-AC1-supplement.pdf]

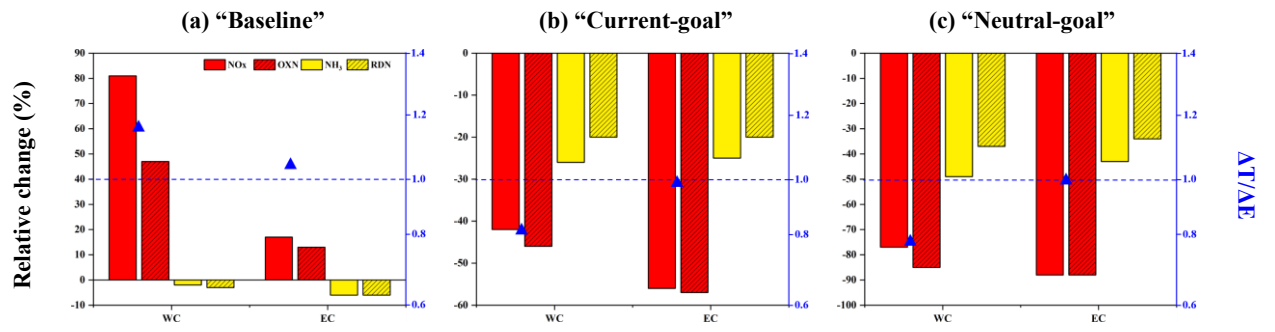

Figure 6 in the revised manuscript: Relative changes in Nr emissions and deposition as well as the ratio of changes in OXN outflow to changes in NO<sub>x</sub> emissions ( $\Delta T/\Delta E$ ) in WC and EC from 2010s to 2060s under different emission scenarios.
