# Supplementary material for: Spatial and temporal evolution of future atmospheric reactive nitrogen deposition in China under different climate change mitigation strategies
Source: Copernicus journal article supplement (doi:10.5194/egusphere-2024-1769), 2024-07-22
Supplement: Supplementary file [file egusphere-2024-1769-AC2-supplement.pdf]

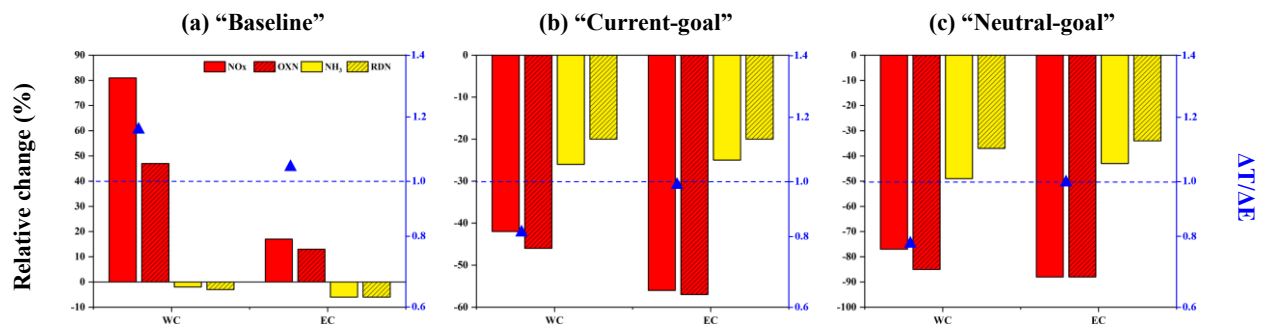

Figure 6 in the revised manuscript: Relative changes in Nr emissions and deposition as well as the ratio of changes in OXN outflow to changes in NO<sub>x</sub> emissions ( $\Delta T/\Delta E$ ) in WC and EC from 2010s to 2060s under different emission scenarios.

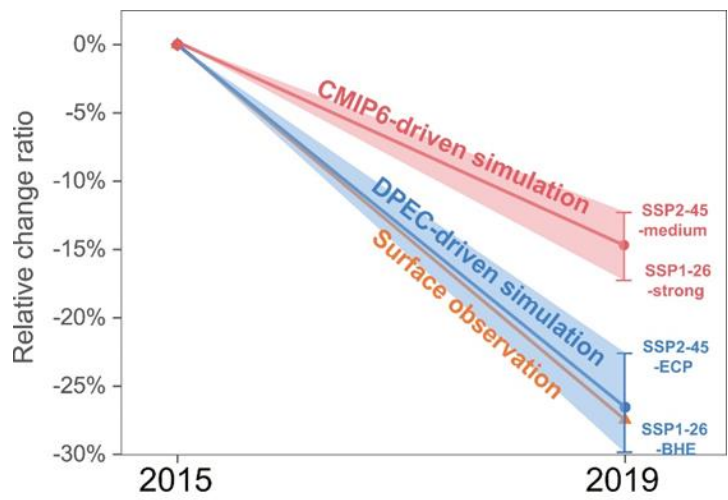

Figure R1 Relative change ratios of surface in-situ observed and simulated PM<sub>2.5</sub> concentrations during 2015-2019 driven by DPEC (blue) and CMIP6 (red) emissions under the strong and medium mitigation pathways.

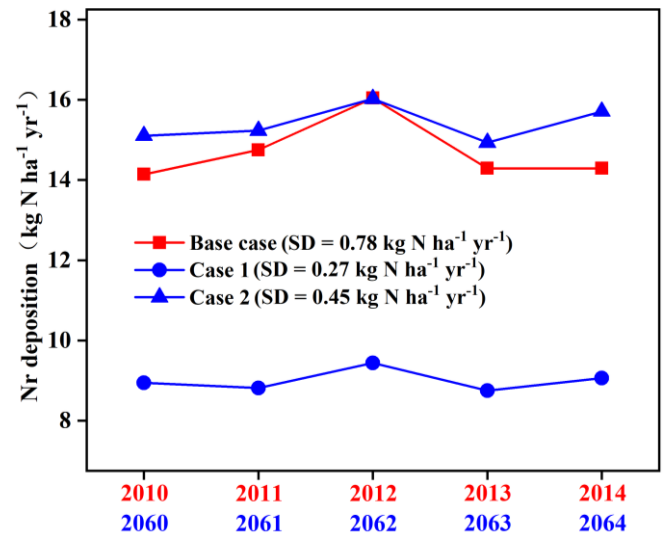

Figure S3 in the revised supplement: Annual Nr deposition flux ( $\text{kg N ha}^{-1} \text{ yr}^{-1}$ ), five-year standard deviation (SD,  $\text{kg N ha}^{-1} \text{ yr}^{-1}$ ) for 2010-2014 (red) and for 2060-2064 (blue) under the SSP2-4.5 (Case 1) and SSP5-8.5 (Case 2).

$$MB = \frac{1}{n} \sum_{i=1}^n (S_i - O_i) \quad (S1)$$

$$ME = \frac{1}{n} \sum_{i=1}^n |S_i - O_i| \quad (S2)$$

where  $S$  and  $O$  are the monthly meteorological variables from model simulation and observation, respectively;  $i$  means the individual month.
